# Supplementary material for: Energetics of Excitatory and Inhibitory Neurotransmission in Aluminum Chloride Model of Alzheimer’s Disease: Reversal of Behavioral and Metabolic Deficits by Rasa Sindoor
Source: PubMed Central journal article supplement (PMC5651029; doi:10.3389/fnmol.2017.00323), 2017-10-17

## *Supplementary Materials*

### **Energetics of Excitatory and Inhibitory Neurotransmission in Aluminum Chloride Model of Alzheimer's Disease: Reversal of Behavioral and Metabolic Deficits by Rasa Sindoor**

Kamal Saba<sup>1</sup>, Niharika Rajnala<sup>1</sup>, Pandichelvam Veeraiah<sup>1</sup>, Vivek Tiwari<sup>1</sup>, Rohit Kumar Rana<sup>2</sup>, Subhash C. Lakhotia<sup>3</sup>, Anant B. Patel<sup>1\*</sup>

<sup>1</sup>*NMR Microimaging and Spectroscopy, CSIR-Centre for Cellular and Molecular Biology, Uppal Road, Hyderabad, India;* <sup>2</sup>*CSIR-Indian Institute of Chemical Technology, Tarnaka, Hyderabad, India;* <sup>3</sup>*Cytogenetics Lab, Department of Zoology, Banaras Hindu University, Varanasi, India*

**\*Correspondence Address:**

Dr. Anant B. Patel, NMR Microimaging and Spectroscopy, Centre for Cellular and Molecular Biology, Uppal Road, Habsiguda, Hyderabad 500007, India

Telephone: +91-40-27192838

Fax: +91-40-27160591

Email: abpatel@ccmb.res.in

**Supplementary Table 1** Mass and isotope balance equations with various rates and pool size for the cerebral cortex

**Mass Balance Equations:**

$$d\text{Glc}_{\text{brain}}/dt = V_{\text{max}(\text{in})} \text{Glc}_{\text{blood}} / (\text{K}_{\text{m}(\text{in})} + \text{Glc}_{\text{blood}}) - V_{\text{max}(\text{out})} \text{Glc}_{\text{brain}} / (\text{K}_{\text{M}(\text{out})} + \text{Glc}_{\text{brain}}) + \text{CMR}_{\text{glc}}$$

$$d\text{Lac}/dt = d\text{Glu}_{\text{Glu}}/dt = d\text{Glu}_{\text{GABA}}/dt = d\text{Glu}_A/dt = d\text{GABA}/dt = d\text{Gln}/dt = d\text{Asp}_{\text{Glu}}/dt = d\text{Asp}_{\text{GABA}}/dt = d\text{Asp}_A/dt = d\text{Lac}/dt = d\text{KG}_{\text{Glu}}/dt = d\text{KG}_{\text{GABA}}/dt = d\text{KG}_A/dt = d\text{OAA}_{\text{Glu}}/dt = d\text{OAA}_{\text{GABA}}/dt = d\text{OAA}_A/dt = 0$$

**Isotope Balance Equations:**

$$d(\text{Glc}_{\text{brain,C16}})/dt = V_{\text{max}(\text{in})} (\text{Glc}_{\text{blood,C16}}) / (\text{K}_{\text{m}(\text{in})} + \text{Glc}_{\text{blood}}) - V_{\text{max}(\text{out})} (\text{Glc}_{\text{brain,C16}}) / (\text{K}_{\text{m}(\text{out})} + \text{Glc}_{\text{brain}}) - \text{CMR}_{\text{glc}} (\text{Glc}_{\text{brain,C16}} / \text{Glc}_{\text{brain}})$$

$$d\text{Lac}_{\text{C3}}/dt = 2 \text{CMR}_{\text{glc}} (\text{Glc}_{\text{brain,C16}} / \text{Glc}_{\text{brain}}) + V_{\text{dil}(\text{Lac})} (0) - (V_{\text{pc}} + V_{\text{dil}(\text{Lac})} + V_{\text{pdh}(\text{A})} + V_{\text{pdh}(\text{GABA})} + V_{\text{pdh}(\text{Glu})}) (\text{Lac}_{\text{C3}} / \text{Lac})$$

$$d\text{Glu}_{\text{Glu,C4}}/dt = V_{\text{cyc}(\text{Glu-Gln})} (\text{Gln}_{\text{C4}} / \text{Gln}) + V_{\text{xGlu}(\text{KG-Glu})} (\text{KG}_{\text{Glu,C4}} / \text{KG}_{\text{Glu}}) - (V_{\text{cyc}(\text{Glu-Gln})} + V_{\text{xGlu}(\text{Glu-KG})}) (\text{Glu}_{\text{Glu,C4}} / \text{Glu}_{\text{Glu}})$$

$$d\text{Glu}_{\text{A,C4}}/dt = V_{\text{cyc}(\text{Glu-Gln})} (\text{Glu}_{\text{Glu,C4}} / \text{Glu}_{\text{Glu}}) + V_{\text{xA}(\text{KG-Glu})} (\text{KG}_{\text{A,C4}} / \text{KG}_{\text{A}}) + V_{\text{cyc}(\text{GABA-Gln})} (\text{KG}_{\text{A,C4}} / \text{KG}_{\text{A}}) - (V_{\text{gln}} + V_{\text{xA}(\text{Glu-KG})}) (\text{Glu}_{\text{A,C4}} / \text{Glu}_{\text{A}})$$

$$d\text{Gln}_4/dt = V_{\text{gln}} (\text{Glu}_{\text{A,C4}} / \text{Glu}_{\text{A}}) + V_{\text{dilGln}} (0) - [V_{\text{efflux}} + V_{\text{cyc}(\text{Glu-Gln})} + V_{\text{cyc}(\text{GABA-Gln})}] (\text{Gln}_4 / \text{Gln})$$

$$d\text{KG}_{\text{A,C4}}/dt = V_{\text{pdh}(\text{A})} (\text{Lac}_{\text{C3}} / \text{Lac}) + V_{\text{xA}(\text{Glu-KG})} (\text{Glu}_{\text{A,C4}} / \text{Glu}_{\text{A}}) + V_{\text{dilA}} (0) - (V_{\text{tca}(\text{ANet})} + V_{\text{xA}(\text{KGGlu})} + V_{\text{cyc}(\text{GABA-Gln})}) (\text{KG}_{\text{A,C4}} / \text{KG}_{\text{A}})$$

$$d\text{KG}_{\text{A,C3}}/dt = V_{\text{xA}(\text{Glu-KG})} (\text{Glu}_{\text{A,C3}} / \text{Glu}_{\text{A}}) + V_{\text{tca}(\text{A})} (\text{OAA}_{\text{A,C2}} / \text{OAA}_{\text{A}}) - (V_{\text{tca}(\text{ANet})} + V_{\text{xA}(\text{KG-Glu})} + V_{\text{cyc}(\text{GABA-Gln})}) (\text{KG}_{\text{A,C3}} / \text{KG}_{\text{A}})$$

$$d\text{Glu}_{\text{A,C3}}/dt = V_{\text{xA}(\text{KG-Glu})} (\text{KG}_{\text{A,C3}} / \text{KG}_{\text{A}}) + V_{\text{cyc}(\text{Glu-Gln})} (\text{Glu}_{\text{Glu,C3}} / \text{Glu}_{\text{Glu}}) + V_{\text{cyc}(\text{GABA-Gln})} (\text{KG}_{\text{A,C3}} / \text{KG}_{\text{A}}) - (V_{\text{gln}} + V_{\text{xA}(\text{Glu-KG})}) (\text{Glu}_{\text{A,C3}} / \text{Glu}_{\text{A}})$$

$$d\text{Gln}_{\text{C3}}/dt = V_{\text{gln}} (\text{Glu}_{\text{A,C3}} / \text{Glu}_{\text{A}}) + V_{\text{dilGln}} (0) - [V_{\text{efflux}} + V_{\text{cyc}(\text{Glu-Gln})} + V_{\text{cyc}(\text{GABA-Gln})}] (\text{Gln}_{\text{C3}} / \text{Gln})$$

$$d\text{Glu}_{\text{Glu,C3}}/dt = V_{\text{cyc}(\text{Glu-Gln})} (\text{Gln}_{\text{C3}} / \text{Gln}) + V_{\text{xGlu}(\text{KG-Glu})} (\text{KG}_{\text{Glu,C3}} / \text{KG}_{\text{Glu}}) - (V_{\text{cyc}(\text{Glu-Gln})} + V_{\text{xGlu}(\text{Glu-KG})}) (\text{Glu}_{\text{Glu,C3}} / \text{Glu}_{\text{Glu}})$$

$$d\text{KG}_{\text{Glu,C4}}/dt = V_{\text{xGlu}(\text{Glu-KG})} (\text{Glu}_{\text{Glu,C4}} / \text{Glu}_{\text{Glu}}) + V_{\text{dil}(\text{Glu})} (0) + V_{\text{pdh}(\text{Glu})} (\text{Lac}_{\text{C3}} / \text{Lac}) - (V_{\text{xGlu}(\text{KG-Glu})} + V_{\text{tca}(\text{Glu})}) (\text{KG}_{\text{Glu,C4}} / \text{KG}_{\text{Glu}})$$

$$d\text{KG}_{\text{Glu,C3}}/dt = V_{\text{xGlu}(\text{Glu-KG})} (\text{Glu}_{\text{Glu,C3}} / \text{Glu}_{\text{Glu}}) + V_{\text{tca}(\text{Glu})} (\text{OAA}_{\text{Glu,C2}} / \text{OAA}_{\text{Glu}}) - (V_{\text{xGlu}(\text{KG-Glu})} + V_{\text{tca}(\text{Glu})}) (\text{KG}_{\text{Glu,C3}} / \text{KG}_{\text{Glu}})$$

$$d\text{Asp}_{\text{Glu},\text{C3}}/dt = V_{\text{xGlu}(\text{OAA-Asp})} (\text{OAA}_{\text{Glu},\text{C2}}/\text{OAA}_{\text{Glu}}) - V_{\text{xGlu}(\text{Asp-OAA})} (\text{Asp}_{\text{Glu},\text{C3}}/\text{Asp}_{\text{Glu}})$$

$$d\text{Asp}_{\text{A},\text{C3}}/dt = V_{\text{xA}(\text{OAA-Asp})} (\text{OAA}_{\text{A},\text{C2}}/\text{OAA}_{\text{A}}) - V_{\text{xA}(\text{Asp-OAA})} (\text{Asp}_{\text{A},\text{C3}}/\text{Asp}_{\text{A}})$$

$$d\text{OAA}_{\text{Glu},\text{C2}}/dt = V_{\text{xGlu}(\text{Asp-OAA})} (\text{Asp}_{\text{Glu},\text{C3}}/\text{Asp}_{\text{Glu}}) + 0.5 V_{\text{tca}(\text{Glu})} (\text{KG}_{\text{Glu},\text{C4}}/\text{KG}_{\text{Glu}}) + 0.5 V_{\text{tca}(\text{Glu})} (\text{KG}_{\text{Glu},\text{C3}}/\text{KG}_{\text{Glu}}) - [V_{\text{xGlu}(\text{OAA-Asp})} + V_{\text{tca}(\text{Glu})}] (\text{OAA}_{\text{Glu},\text{C2}}/\text{OAA}_{\text{Glu}})$$

$$d\text{OAA}_{\text{A},\text{C2}}/dt = 0.5 V_{\text{tcaANet}} (\text{KG}_{\text{A},\text{C4}}/\text{KG}_{\text{A}}) + 0.5 V_{\text{tcaANet}} (\text{KG}_{\text{A},\text{C3}}/\text{KG}_{\text{A}}) + V_{\text{xA}(\text{Asp-OAA})} (\text{Asp}_{\text{A},\text{C3}}/\text{Asp}_{\text{A}}) + 0.5 V_{\text{pc}} (\text{Lac}_{\text{C3}}/\text{Lac}) + V_{\text{cyc}(\text{GABA-Gln})} (\text{GABA}_{\text{C2}}/\text{GABA}) - [V_{\text{xA}(\text{OAA-Asp})} + V_{\text{tcaA}}] (\text{OAA}_{\text{A},\text{C2}}/\text{OAA}_{\text{A}})$$

$$d\text{GABA}_{\text{C2}}/dt = V_{\text{gad}} (\text{Glu}_{\text{GABA},\text{C4}}/\text{Glu}_{\text{GABA}}) - (V_{\text{shunt}} + V_{\text{cyc}(\text{GABA-Gln})}) (\text{GABA}_{\text{C2}}/\text{GABA})$$

$$d\text{KG}_{\text{GABA},\text{C4}}/dt = V_{\text{pdhGABA}} (\text{Lac}_{\text{C3}}/\text{Lac}) + V_{\text{xGABA}(\text{Glu-KG})} (\text{Glu}_{\text{GABA},\text{C4}}/\text{Glu}_{\text{GABA}}) + V_{\text{dilGABA}} (0) - [V_{\text{tcaGABANet}} + V_{\text{xGABA}(\text{KG-Glu})}] (\text{KG}_{\text{GA},\text{C4}}/\text{KG}_{\text{GABA}})$$

$$d\text{Glu}_{\text{GABA},\text{C4}}/dt = V_{\text{cyc}(\text{GABA-Gln})} (\text{Gln}_{\text{C4}}/\text{Gln}) + V_{\text{xGABA}(\text{KG-Glu})} (\text{KG}_{\text{GABA},\text{C4}}/\text{KG}_{\text{GABA}}) - (V_{\text{gad}} + V_{\text{xGABA}(\text{Glu-KG})}) (\text{Glu}_{\text{GABA},\text{C4}}/\text{Glu}_{\text{GABA}})$$

$$d\text{KG}_{\text{GABA},\text{C3}}/dt = V_{\text{xGABA}(\text{Glu-KG})} (\text{Glu}_{\text{GABA},\text{C3}}/\text{Glu}_{\text{GABA}}) + V_{\text{tca}(\text{GABA})} (\text{OAA}_{\text{GABA},\text{C3}}/\text{OAA}_{\text{GABA}}) - (V_{\text{tca}(\text{GABANet})} + V_{\text{xGABA}(\text{KG-Glu})}) (\text{KG}_{\text{GABA},\text{C3}}/\text{KG}_{\text{GABA}})$$

$$d\text{GABA}_{\text{C3}}/dt = V_{\text{gad}} (\text{Glu}_{\text{GABA},\text{C3}}/\text{Glu}_{\text{GABA}}) - (V_{\text{shunt}} + V_{\text{cyc}(\text{GABA-Gln})}) (\text{GABA}_{\text{C3}}/\text{GABA})$$

$$d\text{Glu}_{\text{GABA},\text{C3}}/dt = V_{\text{cyc}(\text{GABA-Gln})} (\text{Gln}_{\text{C3}}/\text{Gln}) + V_{\text{xGABA}(\text{KG-GABA})} (\text{KG}_{\text{GABA},\text{C3}}/\text{KG}_{\text{GABA}}) - [V_{\text{gad}} + V_{\text{xGABA}(\text{Glu-KG})}] (\text{Glu}_{\text{GABA},\text{C3}}/\text{Glu}_{\text{GABA}})$$

$$d\text{Asp}_{\text{GABA},\text{C3}}/dt = V_{\text{xGABA}(\text{OAA-Asp})} (\text{OAA}_{\text{GABA},\text{C2}}/\text{OAA}_{\text{GABA}}) - V_{\text{xGABA}(\text{Asp-OAA})} (\text{Asp}_{\text{GABA},\text{C3}}/\text{Asp}_{\text{GABA}})$$

$$d\text{OAA}_{\text{Glu},\text{C3}}/dt = V_{\text{xGlu}(\text{Asp-OAA})} (\text{Asp}_{\text{Glu},\text{C3}}/\text{Asp}_{\text{Glu}}) + 0.5 V_{\text{tca}(\text{Glu})} (\text{KG}_{\text{Glu},\text{C3}}/\text{KG}_{\text{Glu}}) + 0.5 V_{\text{tca}(\text{Glu})} (\text{KG}_{\text{Glu},\text{C4}}/\text{KG}_{\text{Glu}}) - [V_{\text{xGlu}(\text{OAA-Asp})} + V_{\text{tca}(\text{Glu})}] (\text{OAA}_{\text{Glu},\text{C3}}/\text{OAA}_{\text{Glu}})$$

$$d\text{OAA}_{\text{A},\text{C3}}/dt = V_{\text{cyc}(\text{GABA-Gln})} (\text{GABA}_{\text{A},\text{C3}}/\text{GABA}) + V_{\text{xA}(\text{Asp-OAA})} (\text{Asp}_{\text{A},\text{C3}}/\text{Asp}_{\text{A}}) + 0.5 V_{\text{pc}} (\text{Lac}_{\text{C3}}/\text{Lac}) + 0.5 V_{\text{tcaANet}} (\text{KG}_{\text{A},\text{C4}}/\text{KG}_{\text{A}}) + 0.5 V_{\text{tcaANet}} (\text{KG}_{\text{A},\text{C3}}/\text{KG}_{\text{A}}) - [V_{\text{xA}(\text{OAA-Asp})} + V_{\text{tcaA}}] (\text{OAA}_{\text{A},\text{C3}}/\text{OAA}_{\text{A}})$$

$$d\text{Asp}_{\text{A},\text{C2}}/dt = V_{\text{xA}(\text{OAA-Asp})} (\text{OAA}_{\text{A},\text{C3}}/\text{OAA}_{\text{A}}) - V_{\text{xA}(\text{Asp-OAA})} (\text{Asp}_{\text{A},\text{C2}}/\text{Asp}_{\text{A}})$$

$$d\text{Asp}_{\text{Glu},\text{C2}}/dt = V_{\text{xGlu}(\text{OAA-Asp})} (\text{OAA}_{\text{Glu},\text{C3}}/\text{OAA}_{\text{Glu}}) - V_{\text{xGlu}(\text{Asp-OAA})} (\text{Asp}_{\text{Glu},\text{C2}}/\text{Asp}_{\text{Glu}})$$

$$d\text{Asp}_{\text{GABA},\text{C2}}/dt = V_{\text{xGABA}(\text{OAA-Asp})} (\text{OAA}_{\text{GABA},\text{C3}}/\text{OAA}_{\text{GABA}}) - V_{\text{xGABA}(\text{Asp-OAA})} (\text{Asp}_{\text{GABA},\text{C2}}/\text{Asp}_{\text{GABA}})$$

$$d\text{OAA}_{\text{GABA},\text{C2}}/dt = 0.5 V_{\text{tca}(\text{GABANet})} ((\text{KG}_{\text{GABA},\text{C3}}/\text{KG}_{\text{GABA}}) + (\text{KG}_{\text{GABA},\text{C4}}/\text{KG}_{\text{GABA}})) + 0.5 V_{\text{shunt}} \{(\text{GABA}_{\text{C3}}/\text{GABA}) + (\text{GABA}_{\text{C2}}/\text{GABA})\} + V_{\text{xGABA}(\text{Asp-OAA})} (\text{Asp}_{\text{GABA},\text{C3}}/\text{Asp}_{\text{GABA}}) - (V_{\text{tca}(\text{GABA})} + V_{\text{xGABA}(\text{OAA-Asp})}) (\text{OAA}_{\text{GABA},\text{C2}}/\text{OAA}_{\text{GABA}})$$

$$dOAA_{GABA,C3}/dt = 0.5 V_{tca(GABANet)} ((KG_{GABA,C3} / KG_{GABA}) + (KG_{GABA,C4}/KG_{GABA})) + 0.5 V_{shunt} \{(GABA_{C2}/GABA) + (GABA_{C3}/GABA)\} + V_{xGABA(Asp-OAA)} (Asp_{GABA,C2}/Asp_{GABA}) - (V_{tca(GABA)} + V_{xGABA(OAA-Asp)}) (OAA_{GABA,C3}/OAA_{GABA})$$


---

#### Distribution of Glutamate and Aspartate in Different Compartments [4]:

|           |                 | Glutamatergic<br>Neurons | GABAergic<br>Neurons | Astrocyte |
|-----------|-----------------|--------------------------|----------------------|-----------|
| Glutamate | Cerebral Cortex | 0.82                     | 0.02                 | 0.16      |
|           | Hippocampus     | 0.86                     | 0.02                 | 0.12      |
|           | Striatum        | 0.83                     | 0.02                 | 0.15      |
| Aspartate | Cerebral Cortex | 0.42                     | 0.42                 | 0.16      |
|           | Hippocampus     | 0.44                     | 0.44                 | 0.12      |
|           | Striatum        | 0.425                    | 0.425                | 0.15      |

#### Pool Concentrations:

$$Glc_{Brain} \text{ (Concentration of brain glucose)} = K_{m(out)} X_2 / (V_{max(out)} - X_2) = 3.72 \mu\text{mol/g}$$

$$Glu_{Total} = 12.29 \mu\text{mol/g (measured)}$$

$$Glu_A \text{ (Concentration of Glu in Astrocytes)} = 1.9664 \mu\text{mol/g}$$

$$Glu_{GABA} \text{ (Concentration of Glu in GABAergic neurons)} = 0.2458 \mu\text{mol/g [1,2]}$$

$$Glu_{Glu} \text{ (Concentration of Glu in Glutamatergic neurons)} = 10.0778 \mu\text{mol/g}$$

$$GABA = 2.57 \mu\text{mol/g (measured)}$$

$$Gln = 5.84 \mu\text{mol/g (measured)}$$

$$Asp_{Total} = 2.11 \mu\text{mol/g (measured)}$$

$$Asp_A \text{ (Concentration of Asp in astrocytes)} = 0.3376 \mu\text{mol/g}$$

$$Asp_{GABA} \text{ (Concentration of Asp in GABAergic neurons)} = 0.8862 \mu\text{mol/g}$$

$$Asp_{Glu} \text{ (Concentration of Asp in Glutamatergic neurons)} = 0.8862 \mu\text{mol/g}$$

$$KG_A \text{ (Concentration of } \alpha\text{-KG in astrocytes)} = 0.09 \mu\text{mol/g}$$

$$KG_{Glu} \text{ (Concentration of } \alpha\text{-KG in Glutamatergic neurons)} = 0.1 \mu\text{mol/g}$$

$$KG_{GABA} \text{ (Concentration of } \alpha\text{-KG in GABAergic neurons)} = 0.01 \mu\text{mol/g [3]}$$

$$\text{Lac} = 1.5 \text{ } \mu\text{mol/g}$$

$$\text{OAA}_{\text{Total}} = 0.2 \text{ } \mu\text{mol/g}$$

$$\text{OAA}_A \text{ (Concentration of OAA in astrocytes)} = \text{OAA}_{\text{Total}} - \text{OAA}_N - \text{OAA}_G = 0.05 \text{ } \mu\text{mol/g}$$

$$\text{OAA}_{\text{GABA}} \text{ (Concentration of OAA in GABAergic neurons)} = 0.05 \text{ } \mu\text{mol/g} \text{ [3]}$$

$$\text{OAA}_{\text{Glu}} \text{ (Concentration of OAA in Glutamatergic neurons)} = 0.1 \text{ } \mu\text{mol/g} \text{ [3]}$$

---

### Values of Rates:

---

$$K_{m(\text{in})} \text{ (Michaelis–Menten half-saturation constant for blood-to-brain glucose transport)} = 13.9 \text{ mM} \text{ [4]}$$

$$K_{m(\text{out})} \text{ (Michaelis–Menten half-saturation constant for brain-to-blood glucose transport)} = K_{m(\text{in})} \times V_d = 10.7 \text{ } \mu\text{mol/g} \text{ [4]}$$

$$V_{\text{max}(\text{in})} \text{ (Michaelis–Menten maximum uptake rate for blood-to-brain glucose transport)} = 5.8 \times \text{CMR}_{\text{glc}} = 2.44 \text{ } \mu\text{mol/min/g} \text{ [4]}$$

$$V_{\text{max}(\text{out})} \text{ (Michaelis–Menten maximum uptake rate for brain-to-blood glucose transport)} = V_{\text{max}(\text{in})} = 2.44 \text{ } \mu\text{mol/min/g}$$

$$V_{\text{cyc}(\text{Glu-Gln})}/V_{\text{tca}(\text{Glu})} = 0.39 \text{ [5]}$$

$$V_{\text{cyc}(\text{GABA-Gln})}/V_{\text{tca}(\text{GABA})} = 0.43 \text{ [5]}$$

$$V_d \text{ (space for brain water)} = 0.77 \text{ ml/g} \text{ [6]}$$

$$V_{\text{dilGln}} \text{ (Rate of dilution of glutamine from blood)} = 0.001 \text{ } \mu\text{mol/min/g} \text{ (*iterated*)}$$

$$V_{\text{efflux}} \text{ (Rate of glutamine efflux from brain)} = V_{\text{pc}} + V_{\text{dilGln}} = 0.07 \text{ } \mu\text{mol/min/g}$$

$$V_{\text{pc}} \text{ (Rate of pyruvate carboxylation)} = 0.069 \text{ } \mu\text{mol/min/g} \text{ (*iterated*)}$$

$$V_{\text{tca}(\text{ANet})} = 0.12 \text{ } \mu\text{mol/min/g} \text{ (*iterated*)}$$

$$V_{\text{tca}(A)} \text{ (Astrocytic TCA cycle flux)} = V_{\text{tca}(\text{ANet})} + V_{\text{gln}} - V_{\text{cyc}(\text{Glu-Gln})} = 0.055 \text{ } \mu\text{mol/min/g}$$

$$V_{\text{dilA}} \text{ (Rate of dilution of astrocytic pyruvate/lactate from blood)} = 0.155 \text{ } \mu\text{mol/min/g} \text{ (*iterated*)}$$

$$V_{\text{pdh}(A)} \text{ (Rate of pyruvate dehydrogenase in astrocytes)} = V_{\text{tca}(A)} - V_{\text{dilA}} = 0.067 \text{ } \mu\text{mol/min/g}$$

$$V_{\text{tca}(\text{GABANet})} = 0.225 \text{ } \mu\text{mol/min/g} \text{ (*iterated*)}$$

$$V_{\text{shunt}} \text{ (Flux of GABA shunt)} = 0.003 \text{ } \mu\text{mol/min/g} \text{ (*iterated*)}$$

$$V_{\text{tca}(\text{GABA})} \text{ (TCA cycle flux of GABAergic neurons)} = V_{\text{tca}(\text{GABANet})} + V_{\text{shunt}} = 0.228 \text{ } \mu\text{mol/min/g}$$

$$V_{\text{cyc(GABA-Gln)}} \text{ (GABA-Gln cycle flux)} = \{V_{\text{cyc(GABA-Gln)}}/V_{\text{tca(GABA)}}\} \times V_{\text{tca(GABA)}} = 0.098 \text{ } \mu\text{mol/min/g (calculated)}$$

$$V_{\text{dil(GABA)}} \text{ (Rate of dilution of GABAergic pyruvate/lactate from blood)} = 0.014 \text{ } \mu\text{mol/min/g (iterated)}$$

$$V_{\text{pdh(GABA)}} \text{ (Rate of pyruvate dehydrogenase in GABAergic neurons)} = V_{\text{tca(GABA)}} - V_{\text{dil(GABA)}} = 0.214 \text{ } \mu\text{mol/min/g}$$

$$V_{\text{gad}} \text{ (Rate of GABA synthesis)} = V_{\text{shunt}} + V_{\text{cyc(GABA-Gln)}} = 0.102 \text{ } \mu\text{mol/min/g}$$

$$V_{\text{tca(Glu)}} \text{ (TCA cycle flux of Glutamatergic neurons)} = 0.533 \text{ } \mu\text{mol/min/g (iterated)}$$

$$V_{\text{dil(Glu)}} \text{ (Rate of dilution of pyruvate/lactate in glutamatergic neurons from blood)} = 0.040 \text{ } \mu\text{mol/min/g (iterated)}$$

$$V_{\text{pdh(Glu)}} \text{ (Rate of pyruvate dehydrogenase in Glutamatergic neurons)} = V_{\text{tca(Glu)}} - V_{\text{dil(Glu)}} = 0.493 \text{ } \mu\text{mol/min/g}$$

$$\text{CMR}_{\text{glc}} = (V_{\text{pdh(Glu)}} + V_{\text{pdh(GABA)}} + V_{\text{pdh(A)}} + V_{\text{pc}}) / 2$$

$$V_{\text{cyc(Glu-Gln)}} \text{ (Glu-Gln cycle flux)} = \{V_{\text{cyc(Glu-Gln)}}/V_{\text{tca(Glu)}}\} \times V_{\text{tca(Glu)}} = 0.208 \text{ } \mu\text{mol/min/g (calculated)}$$

$$V_{\text{gln}} \text{ (rate of glutamine synthesis)} = V_{\text{cyc(Glu-Gln)}} + V_{\text{cyc(GABA-Gln)}} + V_{\text{pc}}$$

$$V_{\text{xA(Glu-KG)}} \text{ (Glu and } \alpha\text{-KG exchange flux in astrocytes)} = 1.00 \text{ } \mu\text{mol/min/g}$$

$$V_{\text{xA(Asp-OAA)}} \text{ (Asp and OAA exchange flux in astrocytes)} = V_{\text{xA(OAA-Asp)}} = V_{\text{xA(Glu-KG)}} = 1.00 \text{ } \mu\text{mol/min/g}$$

$$V_{\text{xA(KG-Glu)}} \text{ (} \alpha\text{-KG and Glu exchange flux in astrocytes)} = V_{\text{xA(Glu-KG)}} + V_{\text{pc}} = 1.068 \text{ } \mu\text{mol/min/g}$$

$$V_{\text{xGABA(Glu-KG)}} \text{ (Glu and } \alpha\text{-KG exchange flux in GABAergic neurons)} = 0.503 \text{ } \mu\text{mol/min/g}$$

$$V_{\text{xGABA(Asp-OAA)}} \text{ (Asp and OAA exchange flux in GABAergic neurons)} = V_{\text{xGABA(OAA-Asp)}} = V_{\text{xGABA(Glu-KG)}} = 0.50 \text{ } \mu\text{mol/min/g}$$

$$V_{\text{xGABA(KG-Glu)}} \text{ (} \alpha\text{-KG and Glu exchange flux in GABAergic neurons)} = V_{\text{xGABA(Glu-KG)}} + V_{\text{gad}} - V_{\text{cyc(GABA-Gln)}} = 0.503 \text{ } \mu\text{mol/min/g}$$

$$V_{\text{xGlu(Glu-KG)}} \text{ (Glu and } \alpha\text{-KG exchange flux in glutamatergic neurons)} = 1000 \text{ } \mu\text{mol/min/g (iterated)}$$

$$V_{\text{xGlu(OAA-Asp)}} \text{ (OAA and Asp exchange flux in glutamatergic neurons)} = V_{\text{xGlu(Asp-OAA)}} = V_{\text{xGlu(KG-Glu)}} = V_{\text{xGlu(Glu-KG)}} = 1000 \text{ } \mu\text{mol/min/g}$$

$$X_1 = V_{\text{max(in)}} \text{ Blood}_{\text{(Glucose)}} / (K_{\text{m(in)}} + \text{Blood}_{\text{(Glucose)}}) = 1.051 \text{ } \mu\text{mol/min/g}$$

$$X_2 = X_1 - \text{CMR}_{\text{glc}} = 0.630 \text{ } \mu\text{mol/min/g}$$

#### $V_{cyc}/V_{TCA}$ for Glutamatergic and GABAergic neuron in different brain region [4]:

|                 | Glutamatergic Neurons | GABAergic Neurons |
|-----------------|-----------------------|-------------------|
| Cerebral Cortex | 0.39±0.04             | 0.43±0.02         |
| Hippocampus     | 0.49±0.03             | 0.35±0.02         |
| Striatum        | 0.24±0.03             | 0.43±0.02         |

#### References

1. Patel AJ, Johnson AL, Balazs R: Metabolic compartmentation of glutamate associated with the formation of gamma-aminobutyrate. *J Neurochem* 1974, **23**:1271-1279
2. Storm-Mathisen J, Leknes AK, Bore AT, Vaaland JL, Edminson P, Haug, FM, Ottersen OP: First visualization of glutamate and GABA in neurons by immunocytochemistry. *Nature* 1983, **301**:517-520
3. Hawkins RA, Mans AM: Intermediary metabolism of carbohydrates and other fuels. I. In: *Biochem J* (Lajtha A ed) Plenum Press, New York 1983, **122**:259-294
4. Mason GF, Rothman DL, Behar KL, Shulman RG: NMR determination of the TCA cycle rate and alpha-ketoglutarate/glutamate exchange rate in rat brain. *J Cereb Blood Flow Metab* 1992, **12**:434-447.
5. Tiwari V, Ambadipudi S, Patel AB: Glutamatergic and GABAergic TCA cycle and neurotransmitter cycling fluxes in different regions of mouse brain. *J Cereb Blood Flow Metab* 2014 **33**:1523-1531.
6. Gjedde A, Diemer NH: Autoradiographic determination of regional brain glucose content. *J Cereb Blood Flow Metab* 1983, **3**:303-310

**Supplementary Table 2** Concentration ( $\mu\text{mol/g}$ ) of neuro-metabolites in  $\text{AlCl}_3$ -treated mice

| Brain Region    | Treatment Group        | Neurometabolites |               |               |               |                |                 |                |               |
|-----------------|------------------------|------------------|---------------|---------------|---------------|----------------|-----------------|----------------|---------------|
|                 |                        | Glu              | GABA          | Gln           | Asp           | NAA            | m-Ino           | Tau            | Cho           |
| Cerebral Cortex | NS (n=12)              | 12.1 $\pm$ 0.3   | 2.6 $\pm$ 0.1 | 5.8 $\pm$ 0.4 | 2.1 $\pm$ 0.1 | 7.4 $\pm$ 0.8  | 6.4 $\pm$ 0.1   | 11.9 $\pm$ 0.3 | 1.8 $\pm$ 0.1 |
|                 | $\text{AlCl}_3$ (n=12) | 12.3 $\pm$ 0.3   | 2.7 $\pm$ 0.1 | 6.2 $\pm$ 0.3 | 2.2 $\pm$ 0.2 | 8.0 $\pm$ 0.2  | 6.7 $\pm$ 0.3   | 12.2 $\pm$ 0.4 | 1.9 $\pm$ 0.1 |
| Hippocampus     | NS (n=12)              | 9.9 $\pm$ 0.3    | 3.6 $\pm$ 0.1 | 4.6 $\pm$ 0.2 | 1.6 $\pm$ 0.1 | 6.4 $\pm$ 0.6  | 6.3 $\pm$ 0.2   | 9.7 $\pm$ 0.2  | 1.7 $\pm$ 0.1 |
|                 | $\text{AlCl}_3$ (n=12) | 10.5 $\pm$ 0.2   | 3.8 $\pm$ 0.3 | 5.0 $\pm$ 0.2 | 1.9 $\pm$ 0.1 | 7.2 $\pm$ 0.2  | 7.5 $\pm$ 0.3** | 10.3 $\pm$ 0.4 | 2.0 $\pm$ 0.1 |
| Striatum        | NS (n=12)              | 10.9 $\pm$ 0.4   | 5.9 $\pm$ 0.3 | 5.9 $\pm$ 0.4 | 1.7 $\pm$ 0.1 | 7.9 $\pm$ 0.3  | 7.5 $\pm$ 0.2   | 11.4 $\pm$ 0.5 | 2.4 $\pm$ 0.1 |
|                 | $\text{AlCl}_3$ (n=12) | 9.6 $\pm$ 0.2*   | 6.3 $\pm$ 0.3 | 6.0 $\pm$ 0.3 | 1.8 $\pm$ 0.1 | 7.1 $\pm$ 0.3* | 7.3 $\pm$ 0.4   | 10.2 $\pm$ 0.6 | 2.2 $\pm$ 0.2 |

Concentration of metabolites was measured in non-edited  $^1\text{H}$ - $^{13}\text{C}$ -NMR spectrum of tissue extracts using  $[2\text{-}^{13}\text{C}]$ glycine as standard. Values are represented as mean $\pm$ SEM. \*  $p < 0.01$ , \*\*  $p < 0.001$  when  $\text{AlCl}_3$  treated mice were compared with normal saline treated controls. NS, normal saline.



**Supplementary Figure 1** The level of mercury in  $\text{AlCl}_3$  and RS treated mice. The mercury level was measured in cortical homogenate using inductively coupled plasma mass spectrometry (ICP-MS).

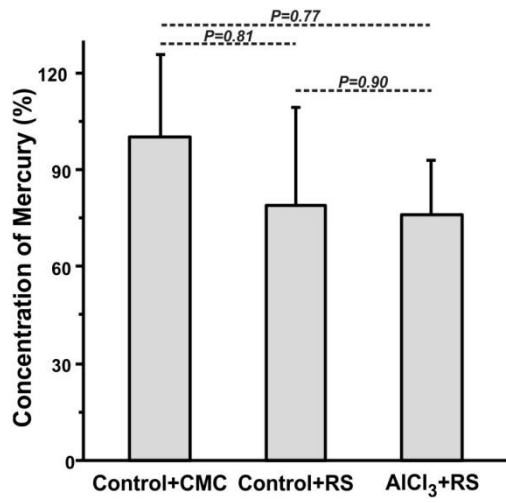

**Supplementary Figure 2** The  $^1\text{H}$ - $^{13}\text{C}$ -NMR spectra from mouse cerebral cortex showing  $^{13}\text{C}$  labeling of amino acids from  $[1,6\text{-}^{13}\text{C}_2]\text{glucose}$ . Mice were administered Rasa Sindoor (2 g/kg, intragastric) for 30 days in  $\text{AlCl}_3$  treated mice (40 mg/kg, intragastric). Mice were infused with  $[1,6\text{-}^{13}\text{C}_2]\text{glucose}$  for 10 min, and cortical metabolites were extracted using ethanol extraction protocol. The  $^1\text{H}$ - $^{13}\text{C}$ -NMR spectra of cortical extracts were recorded using 600 MHz NMR spectrometer.

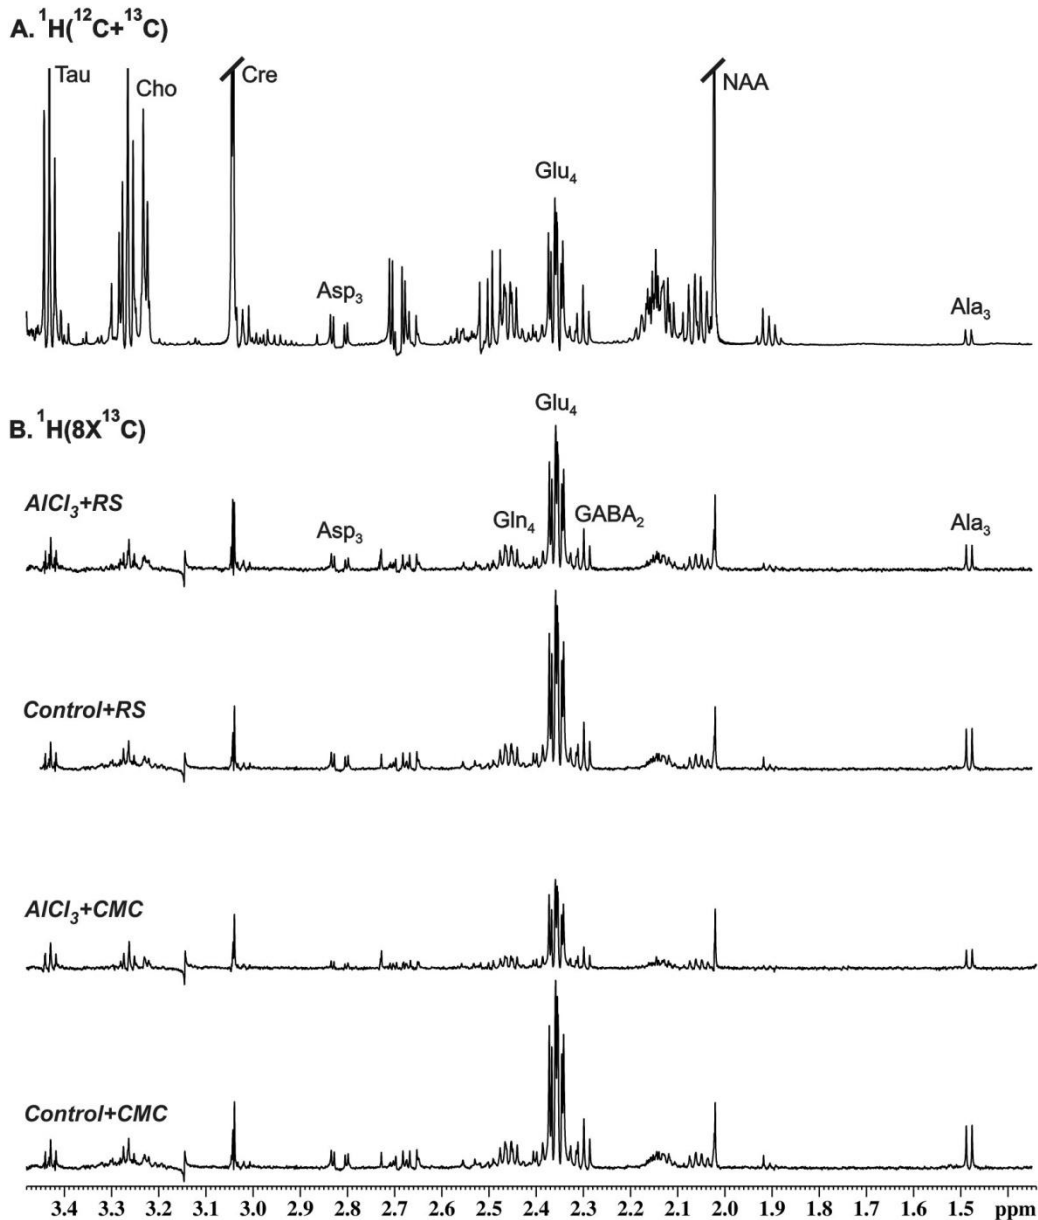

Supplement: Presentation_1.pdf [file Presentation_1.pdf]
